# Supplementary material for: Core-Shell Structured PLGA Particles Having Highly Controllable Ketoprofen Drug Release
Source: MDPI journal article supplement (doi:10.3390/pharmaceutics15051355), 2023-04-28
Supplement: s1 [file s1]

# Supplementary Materials: Core-Shell-Structured PLGA Particles With Highly-Controllable Ketoprofen Drug Release

Norbert Varga <sup>1,2</sup>, Rita Béltéki <sup>1,2</sup>, Ádám Juhász <sup>1,2</sup> and Edit Csapó <sup>1,2,\*</sup>

<sup>1</sup> MTA-SZTE Lendület “Momentum” Noble Metal Nanostructures Research Group, University of Szeged, H-6720 Rerrich B. sqr. 1, Szeged and Hungary

<sup>2</sup> Interdisciplinary Excellence Center, Department of Physical Chemistry and Materials Science, University of Szeged, H-6720 Rerrich B. sqr. 1, Szeged, Hungary

\* Correspondence: juhaszne.csapo.edit@med.u-szeged.hu; Tel.: (+36(62)544-476); ORCID: 0000-0002-6980-9524

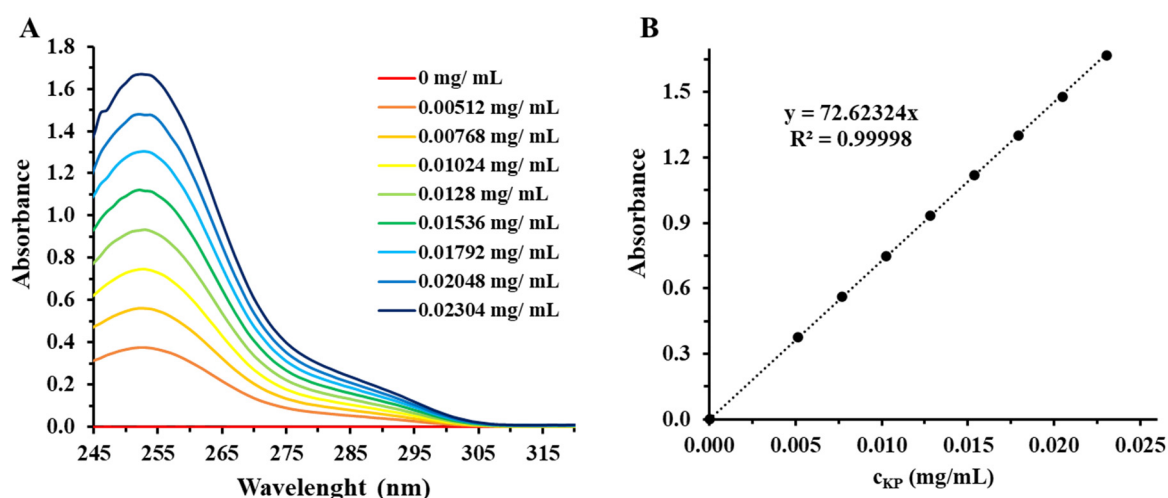

**Figure S1.** (A) UV-Vis spectra and (B) calibration curve (at 252 nm) of the ketoprofen in 1,4 – dioxane.

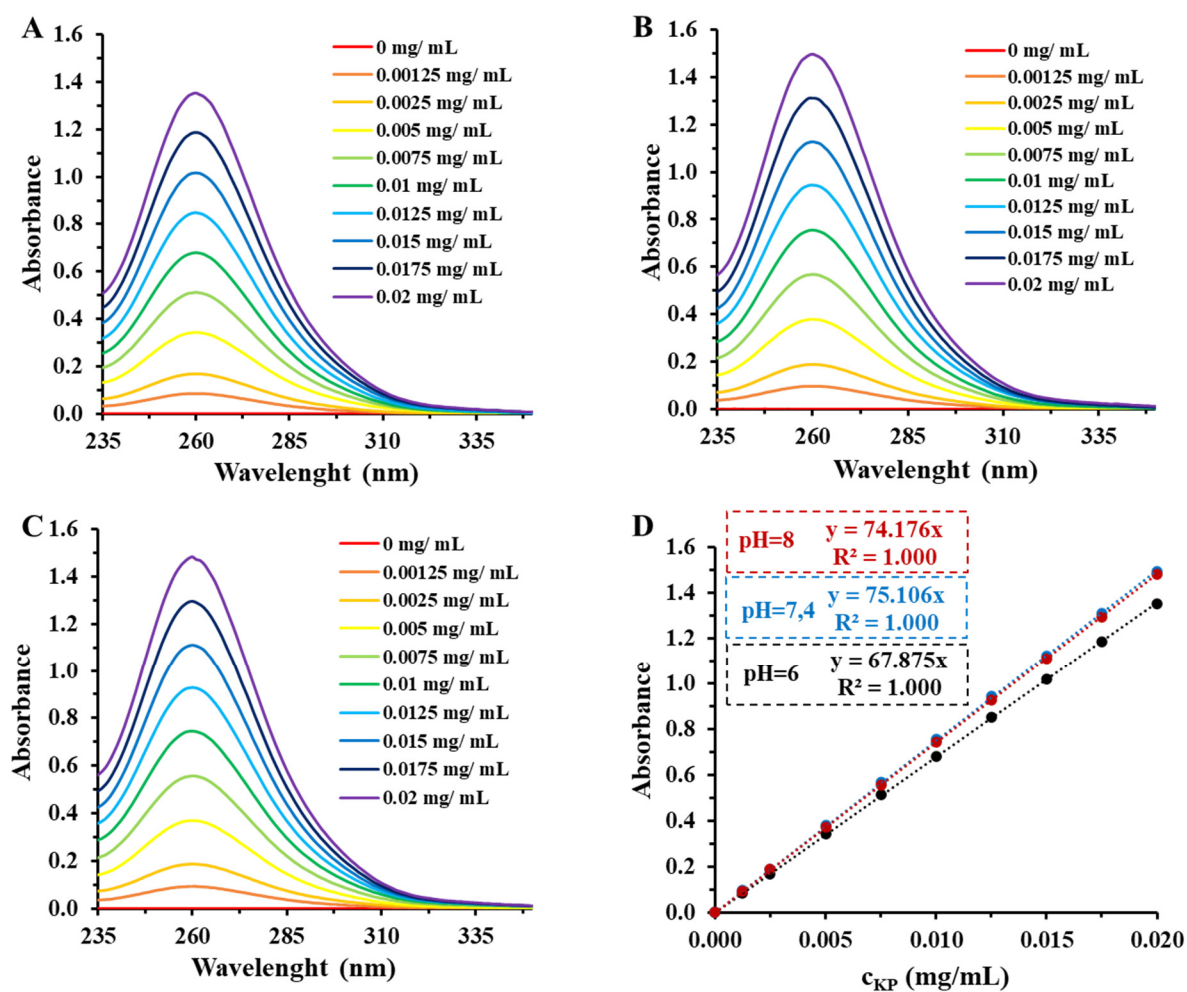

**Figure S2.** UV-Vis spectra of the ketoprofen at (A) pH = 6.0, (B) 7.4 and (C) 8.0 in phosphate buffer (with 0.9 % NaCl) and (D) calibration curve at 260 nm.

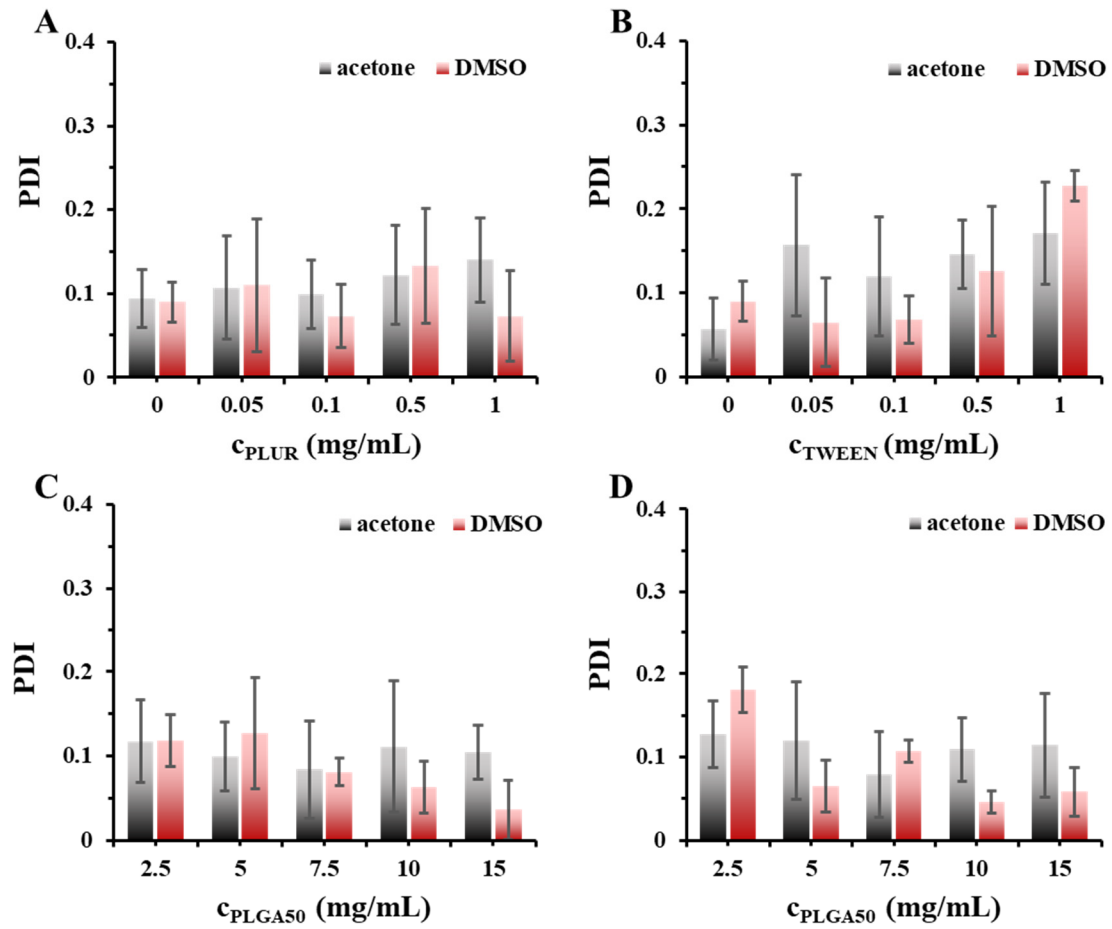

**Figure S3.** Change of the polydispersity of the drug-free PLGA50 systems at different initial (A,B) stabilizer ( $c_{PLGA50} = 5$  mg/mL;  $c_{stabilizer} = 0 - 1$  mg/mL;  $V_{stabilizer} = 5$  mL; 1:10 organic solvent:water ratio) and (C,D) PLGA ( $c_{PLGA50} = 2.5 - 15$  mg/mL;  $c_{stabilizer} = 0.1$  mg/mL;  $V_{stabilizer} = 5$  mL; 1:10 organic solvent:water ratio) concentrations (A,C: PLUR stabilizer; B,D: TWEEN stabilizer; acetone and DMSO are marked with black and red column, respectively, in the online form).

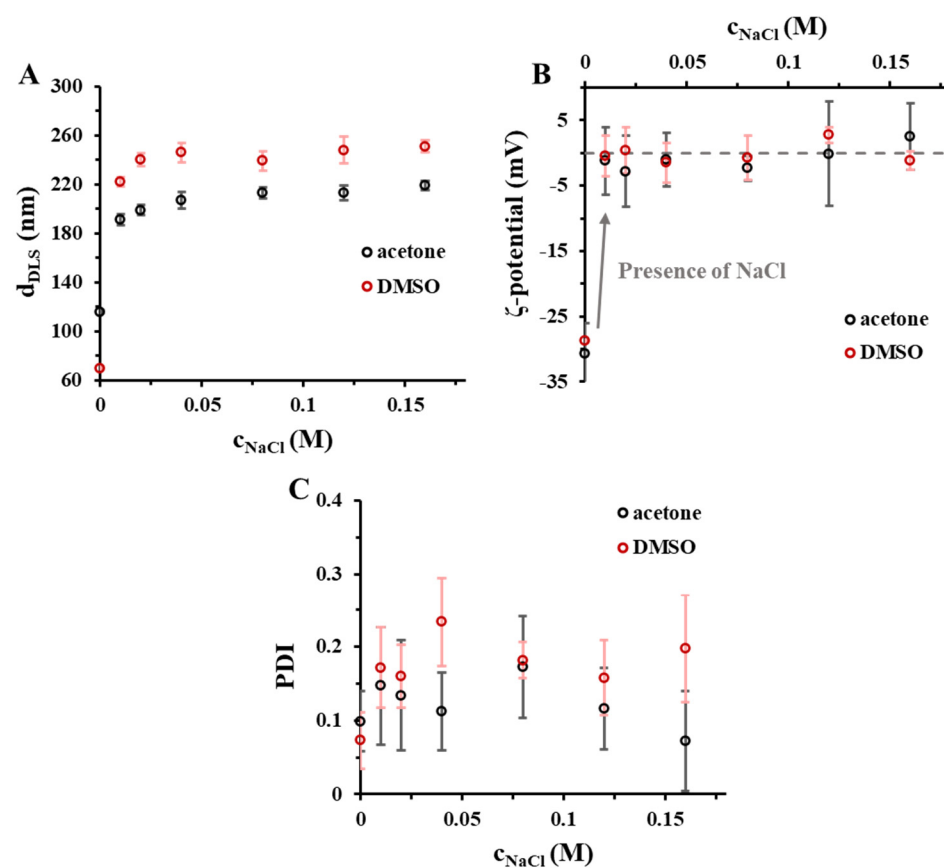

**Figure S4.** (A) Hydrodynamic diameter, (B)  $\zeta$ -potential, and (C) polydispersity (PDI) of the drug-free PLUR/PLGA50 colloidal particles at different NaCl concentrations ( $c_{PLGA50} = 5$  mg/mL;  $c_{stabilizer} = 0.1$  mg/mL;  $V_{stabilizer} = 5$  mL; 1:10 organic solvent:water ratio; acetone and DMSO are marked with black and red  $\circ$  symbol, respectively, in the online form).

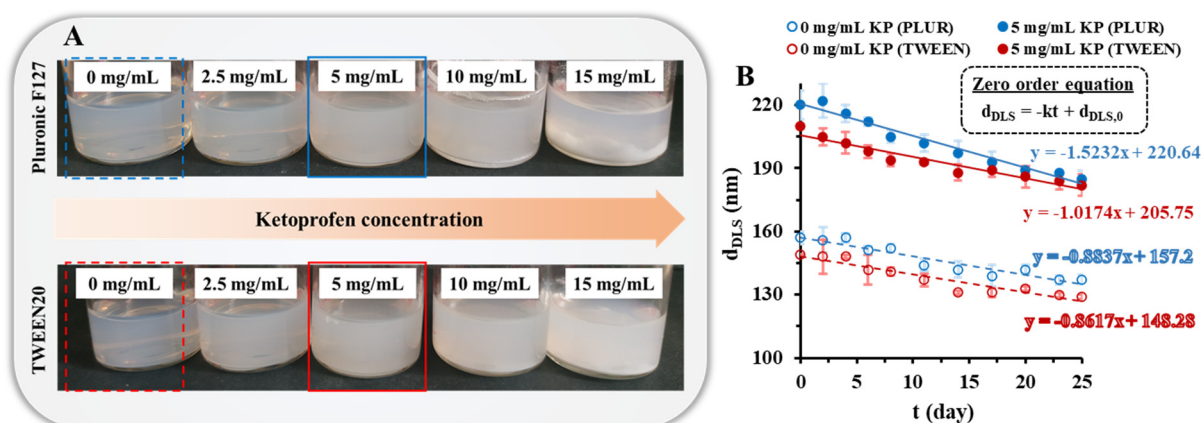

**Figure S5. (A)** Representative pictures from the prepared KP-loaded PLGA50 NPs at different drug concentrations and **(B)** change of the hydrodynamic diameters of the drug-free and 5 mg/mL KP-contained carriers in 0–25 day range, with the fitted zero order equation ( $C_{PLGA50} = 10$  mg/mL;  $C_{PLUR/TWEEN} = 0.1$  mg/mL,  $V_{PLUR/TWEEN} = 5$  mL; 1:10 organic solvent:water ratio).

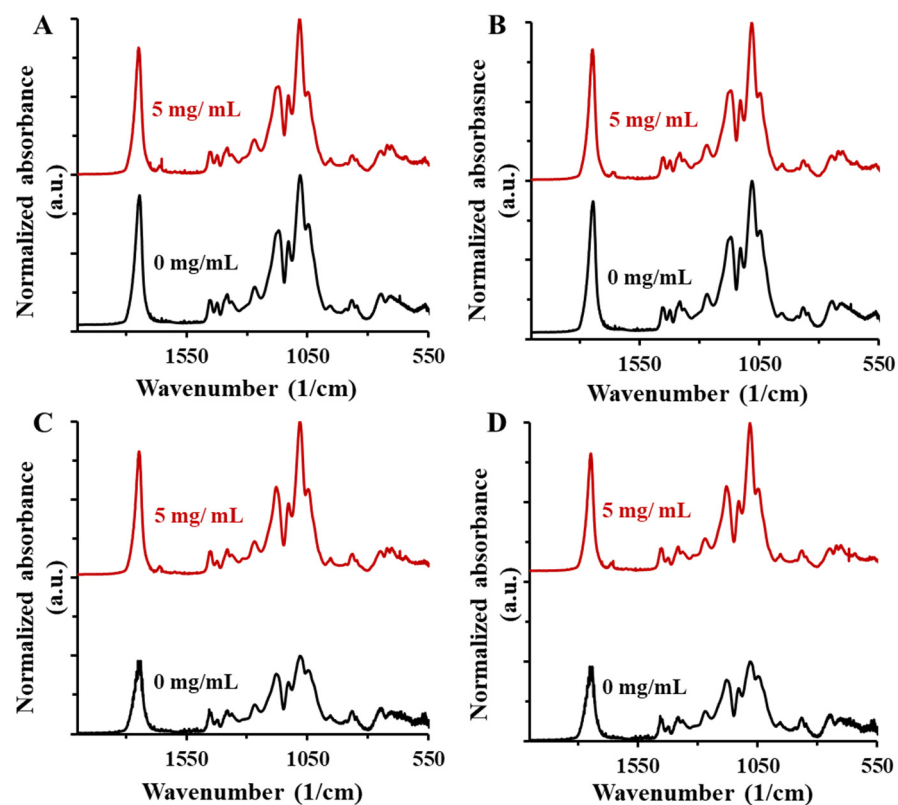

**Figure S6.** FT-IR spectra of the KP-loaded (A,B) PLGA65 and (C,D) 75 NPs ( $C_{PLGA50} = 10 \text{ mg/mL}$ ;  $C_{KP} = 0$  and  $5 \text{ mg/mL}$ ,  $C_{PLUR/TWEEN} = 0.1 \text{ mg/mL}$ ; A,C: PLUR stabilizer; B,D: TWEEN stabilizer).

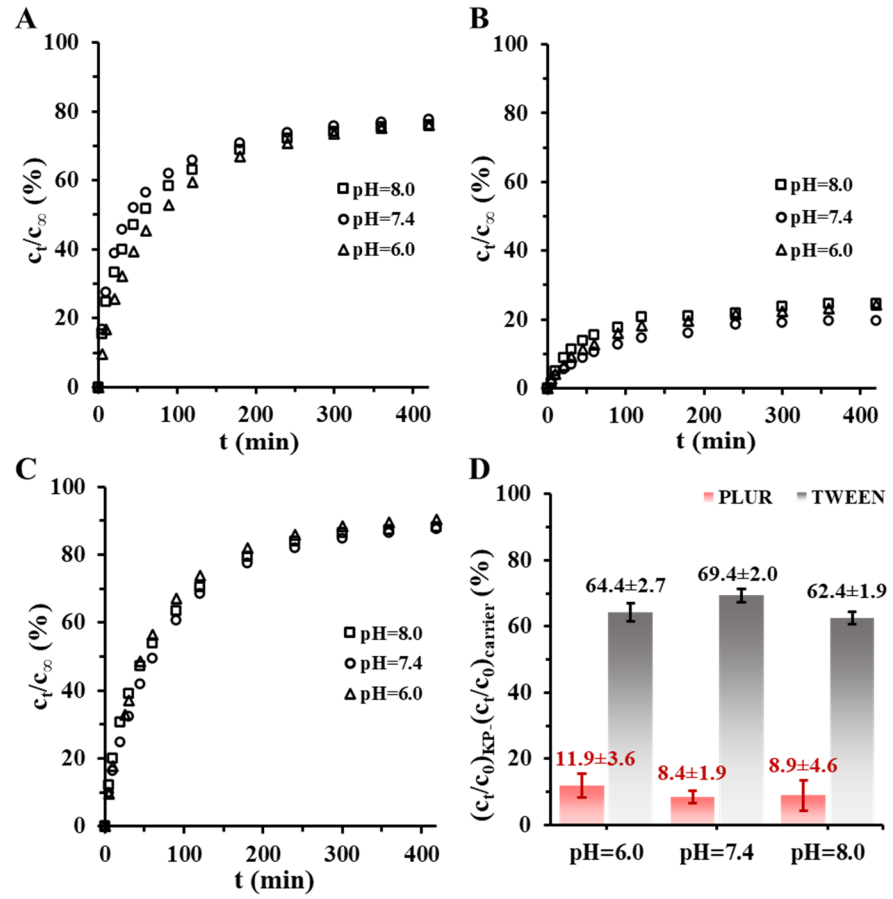

**Figure S7.** The dissolution curves of the (A) PLUR/PLGA50/KP NPs, (B) TWEEN/PLGA50/KP NPs, and (C) solid KP at different pH levels ( $T = 37^\circ\text{C}$ ; pH = 6 - 8 phosphate buffer medium; 0.9 % NaCl), and (D) the retention of the PLGA50/KP NPs, corrected with released drug values of the solid KP at 420 min.

**Table S1.** The hydrodynamic diameter ( $d_{DLS}$ ), polydispersity (PDI), encapsulation efficiency (EE (%)), and drug-loading (DL (%)) of the KP-loaded PLGA NPs ( $c_{PLGA} = 10 \text{ mg/mL}$ ;  $V_{PLGA50} = 0.5 \text{ mL}$ ;  $c_{PLUR/TWEEN} = 0.1 \text{ mg/mL}$ ;  $V_{PLUR/TWEEN} = 5 \text{ mL}$ ).

|               |        | $c_{KP}$<br>(mg/mL) | $d_{DLS} \pm SD$<br>(nm) | PDI $\pm SD$      | EE $\pm SD$ (%) | DL $\pm SD$ (%) |
|---------------|--------|---------------------|--------------------------|-------------------|-----------------|-----------------|
| PLURONIC F127 | PLGA50 | 0.0                 | 149 $\pm$ 3              | 0.144 $\pm$ 0.054 | -               | -               |
|               |        | 5.0                 | 212 $\pm$ 6              | 0.106 $\pm$ 0.074 | 18.2 $\pm$ 1.4  | 8.3 $\pm$ 0.6   |
|               | PLGA65 | 0.0                 | 160 $\pm$ 2              | 0.150 $\pm$ 0.046 | -               | -               |
|               |        | 5.0                 | 226 $\pm$ 3              | 0.121 $\pm$ 0.018 | 14.9 $\pm$ 2.1  | 6.9 $\pm$ 0.9   |
|               | PLGA75 | 0.0                 | 162 $\pm$ 3              | 0.116 $\pm$ 0.071 | -               | -               |
|               |        | 5.0                 | 232 $\pm$ 6              | 0.060 $\pm$ 0.043 | 16.5 $\pm$ 0.6  | 7.6 $\pm$ 0.3   |
| TWEEN 20      | PLGA50 | 0.0                 | 139 $\pm$ 2              | 0.076 $\pm$ 0.030 | -               | -               |
|               |        | 5.0                 | 198 $\pm$ 4              | 0.131 $\pm$ 0.057 | 14.3 $\pm$ 1.1  | 6.7 $\pm$ 0.5   |
|               | PLGA65 | 0.0                 | 161 $\pm$ 3              | 0.067 $\pm$ 0.034 | -               | -               |
|               |        | 5.0                 | 233 $\pm$ 2              | 0.137 $\pm$ 0.084 | 14.6 $\pm$ 2.5  | 6.8 $\pm$ 1.1   |
|               | PLGA75 | 0.0                 | 158 $\pm$ 2              | 0.120 $\pm$ 0.065 | -               | -               |
|               |        | 5.0                 | 227 $\pm$ 8              | 0.087 $\pm$ 0.020 | 16.2 $\pm$ 3.8  | 7.5 $\pm$ 1.6   |

**Table S2.** The determined parameters of KP dissolution after fitting several kinetic formulations.

|             |          | Second Order                               |                | Weibull |        |                | Korsmeyer-Peppas                     |        |                |
|-------------|----------|--------------------------------------------|----------------|---------|--------|----------------|--------------------------------------|--------|----------------|
| Formulation |          | k<br>(mLmg <sup>-1</sup> s <sup>-1</sup> ) | R <sup>2</sup> | a       | b      | R <sup>2</sup> | k <sub>m</sub><br>(s <sup>-n</sup> ) | n      | R <sup>2</sup> |
| TWEEN PLUR  | solid KP | 0.0205                                     | 0.9982         | 0.0025  | 0.6834 | 0.9953         | 0.0207                               | 0.3789 | 0.9642         |
|             | PLGA50   | 0.0503                                     | 0.9767         | 0.0228  | 0.4348 | 0.9830         | 0.0682                               | 0.2503 | 0.9551         |
|             | PLGA65   | 0.0585                                     | 0.9918         | 0.0112  | 0.5247 | 0.9769         | 0.0533                               | 0.2811 | 0.9346         |
|             | PLGA75   | 0.0909                                     | 0.9916         | 0.0175  | 0.5006 | 0.9764         | 0.0860                               | 0.2397 | 0.9291         |
|             | PLGA50   | 0.0019                                     | 0.8420         | 0.0031  | 0.4190 | 0.9742         | 0.0037                               | 0.3915 | 0.9714         |
|             | PLGA65   | 0.0041                                     | 0.9000         | 0.0039  | 0.4645 | 0.9836         | 0.0058                               | 0.4059 | 0.9789         |
|             | PLGA75   | 0.0198                                     | 0.9569         | 0.0076  | 0.4957 | 0.9829         | 0.0179                               | 0.3632 | 0.9683         |
